# Supplementary material for: Molecular Determinant Underlying Selective Coupling of Primary G‐Protein by Class A GPCRs
Source: PubMed Central journal article supplement (PMC11187927; doi:10.1002/advs.202310120), 2024-04-22
Supplement: ADVS-11-2310120-s001.pdf [file ADVS-11-2310120-s001.pdf]

# ADVANCED SCIENCE

Open Access

## Supporting Information

for *Adv. Sci.*, DOI 10.1002/adv.202310120

Molecular Determinant Underlying Selective Coupling of Primary G-Protein by Class A GPCRs

*Qingya Shen, Xinyan Tang, Xin Wen, Shizhuo Cheng, Peng Xiao, Shao-Kun Zang, Dan-Dan Shen, Lei Jiang, Yanrong Zheng, Huibing Zhang, Haomang Xu, Chunyou Mao, Min Zhang\*, Weiwei Hu\*, Jin-Peng Sun\*, Yan Zhang\* and Zhong Chen\**

# **Molecular Determinant Underlying Selective Coupling of Primary G-protein by Class A GPCRs**

*Qingya Shen<sup>#</sup>, Xinyan Tang<sup>#</sup>, Xin Wen<sup>#</sup>, Shizhuo Cheng<sup>#</sup>, Peng Xiao, Shao-Kun Zang, Dan-Dan Shen, Lei Jiang, Yanrong Zheng, Huibing Zhang, Haomang Xu, Chunyou Mao, Min Zhang\*, Weiwei Hu\*, Jin-Peng Sun\*, Yan Zhang\*, and Zhong Chen\**

## **Supporting Information**

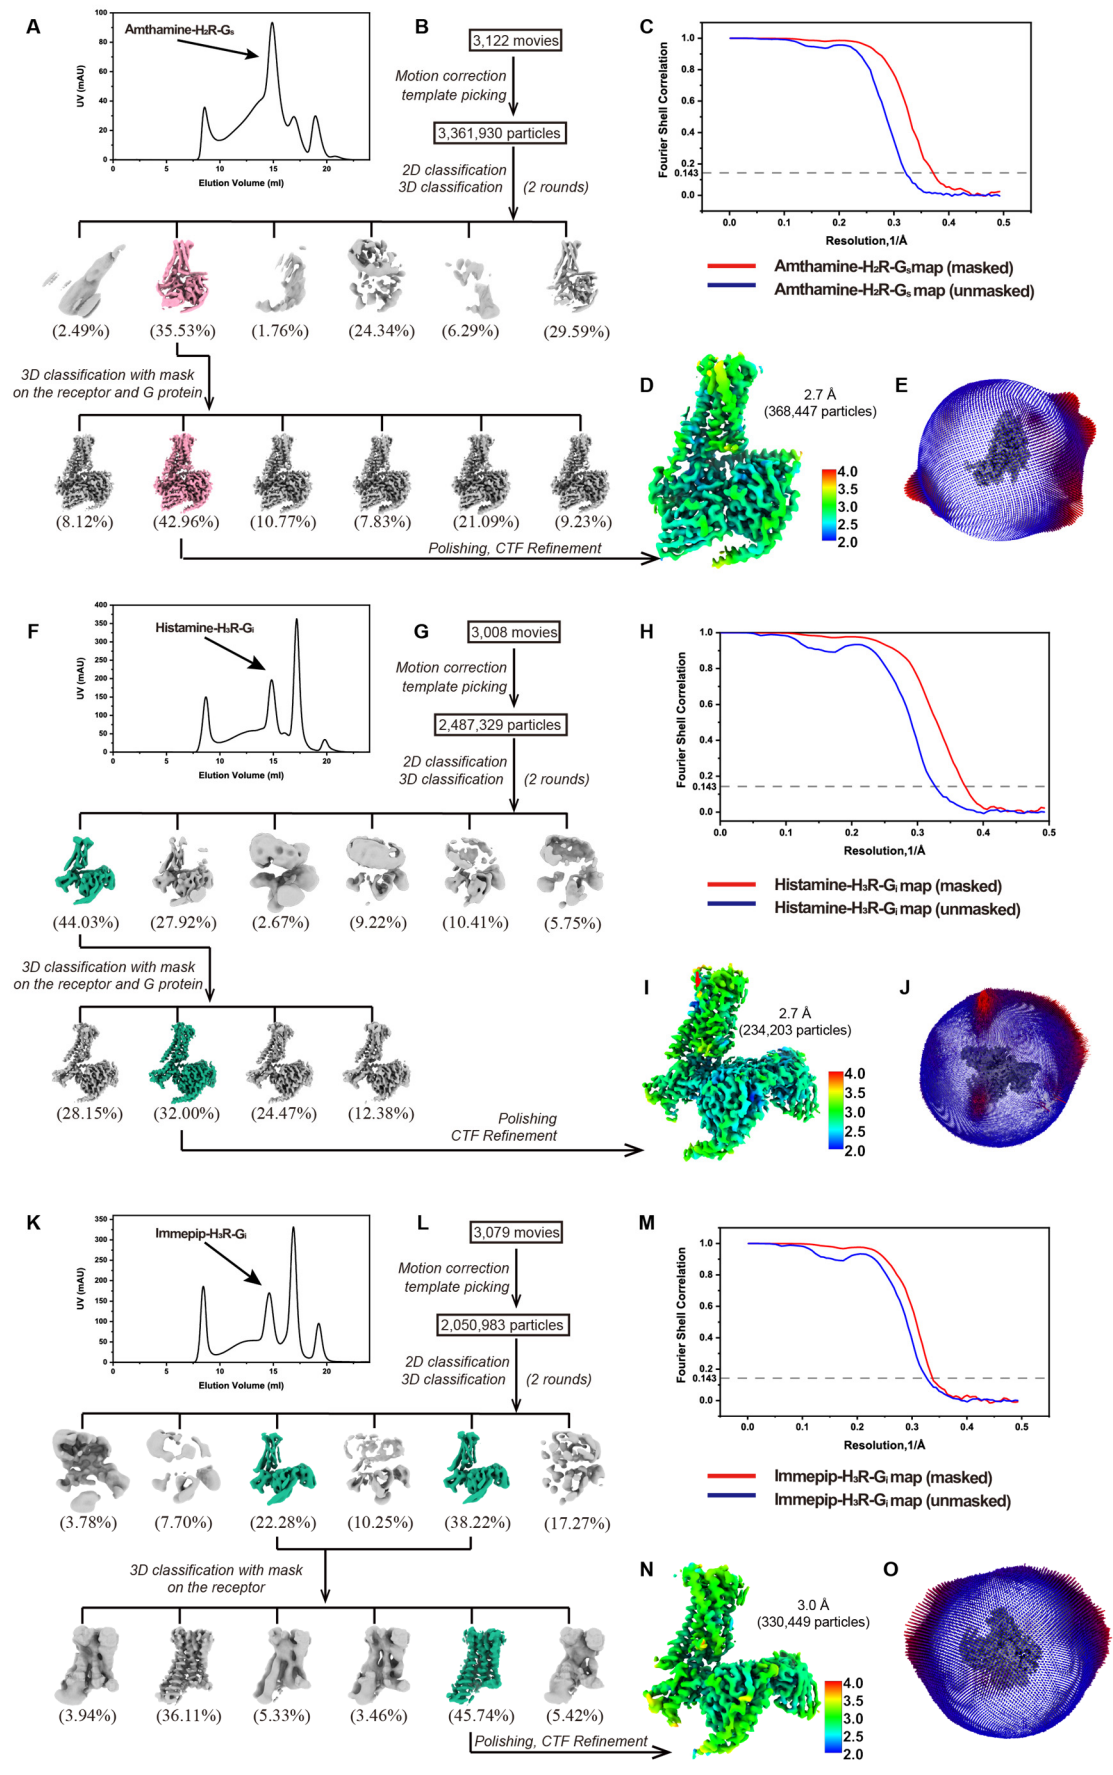

**Figure S1.** Preparation of amthamine-bound H<sub>2</sub>R-G<sub>s</sub> and histamine- and immepip-bound H<sub>3</sub>R-G<sub>i</sub> complexes and cryo-EM data processing. A-E) Purification and data processing of amthamine-bound H<sub>2</sub>R-G<sub>s</sub> complex. (A) Size exclusion chromatography (SEC) profile of the complex. (B) Flow chart of the cryo-EM data processing for the complex. (C) The “Gold-standard” Fourier shell correlation (FSC) curves of the complex. (D) Cryo-EM map of the complex colored by local resolution (Å). (E) Angular distribution map of the complex. F-J, Purification and data processing of histamine-bound H<sub>3</sub>R-G<sub>i</sub> complex. K-O, Purification and data processing of immepip-bound H<sub>3</sub>R-G<sub>i</sub> complex.



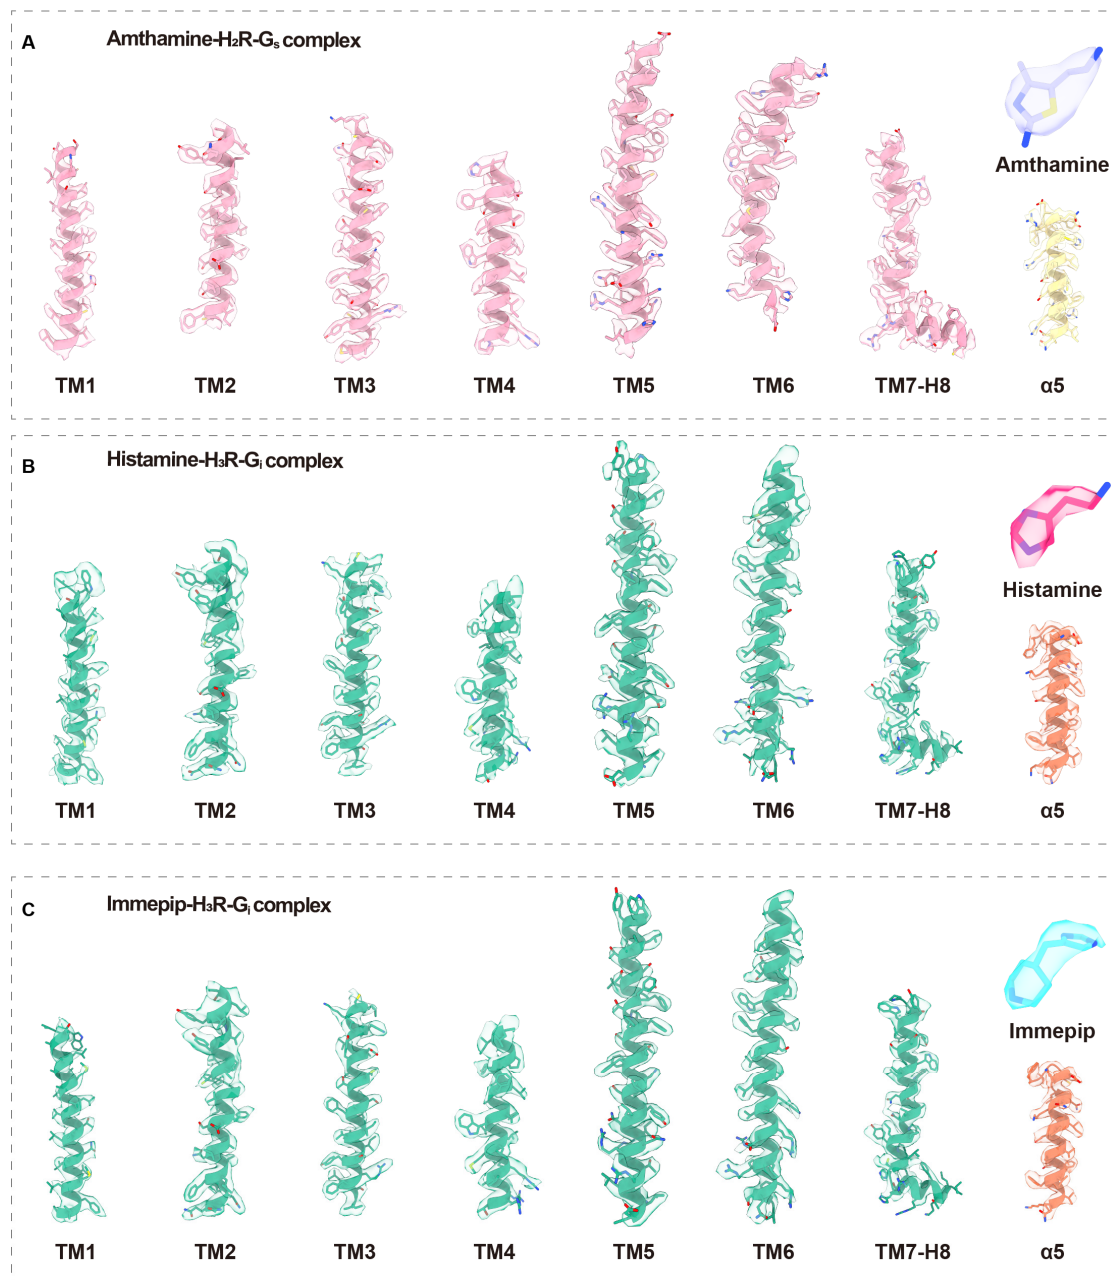

**Figure S2.** Cryo-EM quality of amthamine-bound H<sub>2</sub>R-G<sub>s</sub> and histamine- and immepip-bound H<sub>3</sub>R-G<sub>i</sub> complexes. A-C) EM density maps and models of 7TM of the receptor, the  $\alpha$ 5 helix of G $\alpha$ , and agonist of amthamine-bound H<sub>2</sub>R-G<sub>s</sub> (A), histamine-bound H<sub>3</sub>R-G<sub>i</sub> (B), and immepip-bound H<sub>3</sub>R-G<sub>i</sub> (C) complexes.

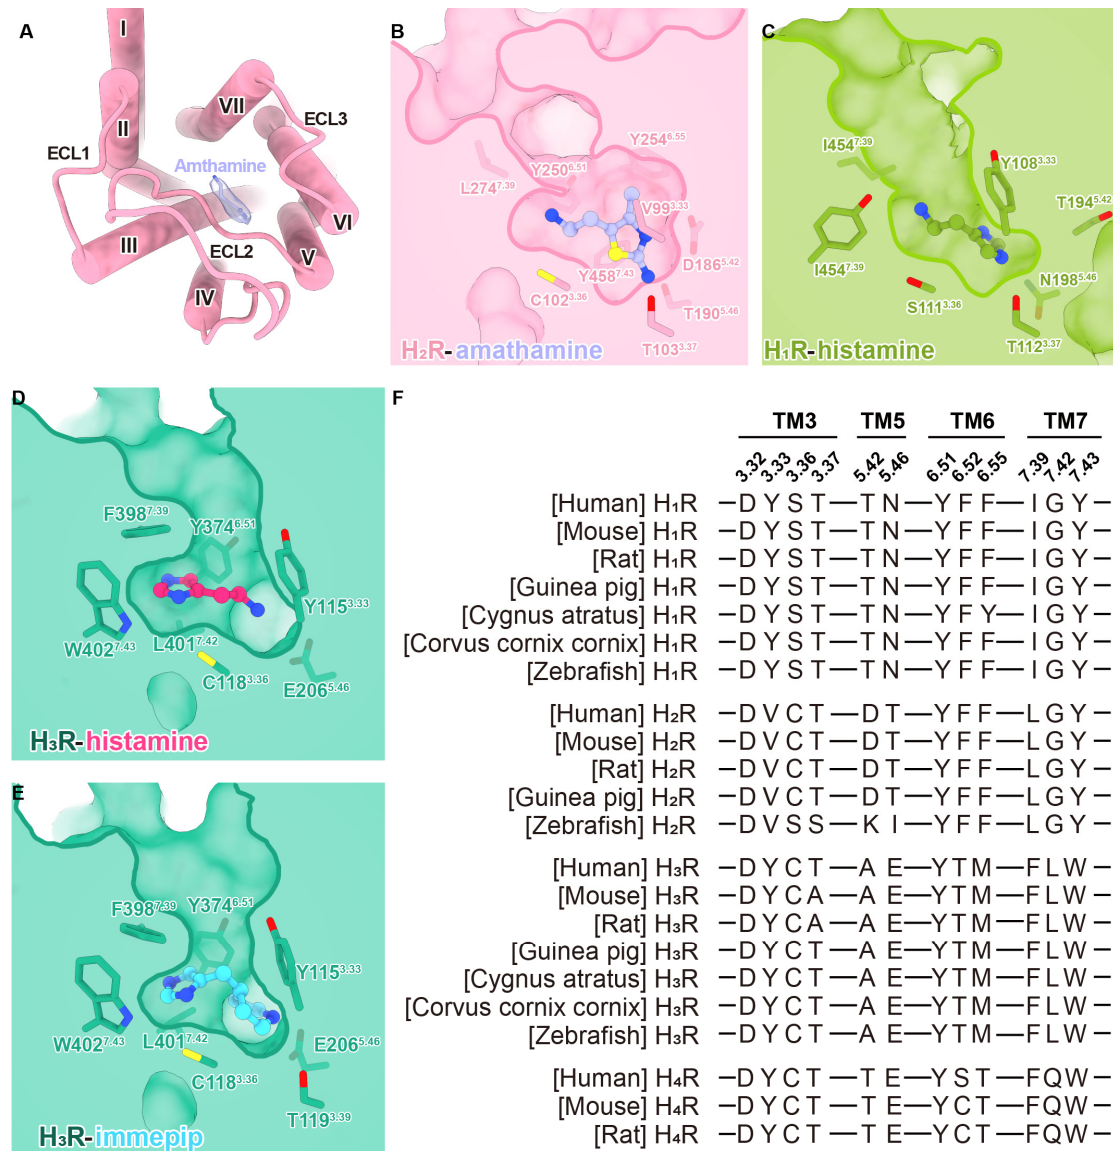

**Figure S3.** Ligand pocket of histamine receptors. A) Cartoon representation of the orthosteric pocket of H<sub>2</sub>R. The cryo-EM density map of the ligand amthamine is displayed and colored in blue-violet. B-E) Sliced surface representations of the ligand pockets of the H<sub>2</sub>R-amthamine (B), H<sub>1</sub>R-histamine (C), H<sub>3</sub>R-histamine (D), and H<sub>3</sub>R-immepip (E) complexes. The receptors are presented as surfaces, while the residues in the ligand pocket are depicted as sticks. The ligands in the pockets are illustrated as ball-and-stick models. F) Sequence alignment of the orthosteric pocket of histamine receptors across different species.

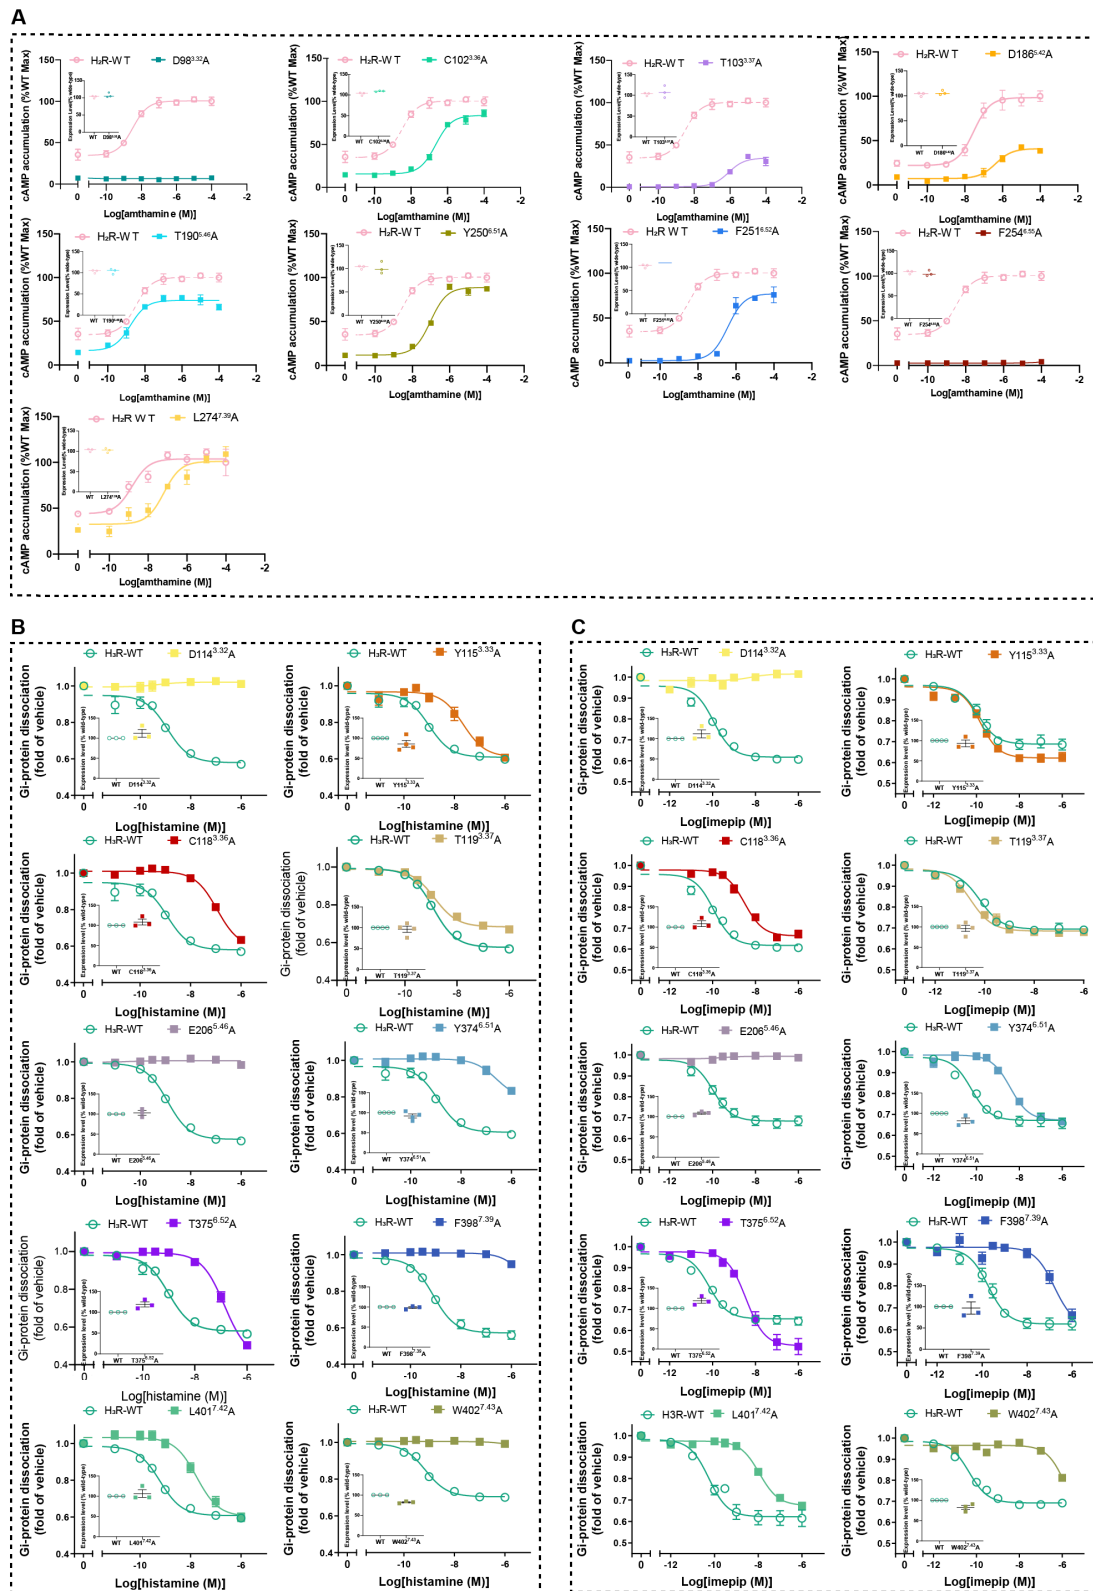

**Figure S4.** Functional analysis of H<sub>2</sub>R and H<sub>3</sub>R mutants. A) Dose-dependent curves for amthamine induced cAMP accumulation in HEK293 cells expressing the H<sub>2</sub>R mutants of the residues in orthosteric pocket by GloSensor assays (n=3). B) Dose-dependent

curves for histamine induced G-protein dissociation in HEK293 cells expressing the H<sub>3</sub>R mutants of the residues in orthosteric pocket by NanoBiT assays (n=3). C) Dose-dependent curves for immepip induced G-protein dissociation in HEK293 cells expressing the H<sub>3</sub>R mutants of the residues in orthosteric pocket by NanoBiT assays (n=3).

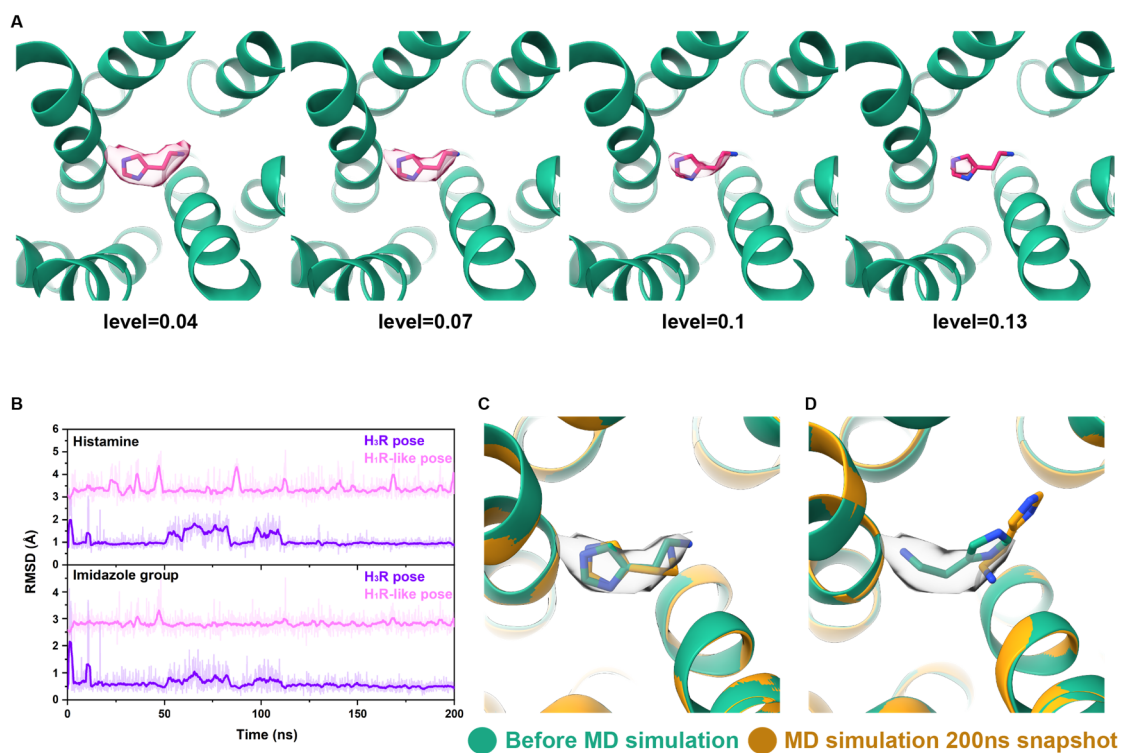

**Figure S5.** Cryo-EM density map and molecular dynamics simulations analyses of the specific pose of histamine bound to H<sub>3</sub>R. A) Cryo-EM density map of histamine shown at the level of 0.04, 0.07, 0.1, and 0.13 of H<sub>3</sub>R-histamine complex. B) RMSD analyses of H<sub>3</sub>R-histamine 200ns trajectories based on the two poses of histamine. (Up) RMSDs of histamine in H<sub>3</sub>R pose (purple) and H<sub>1</sub>R-like pose (pink). (Down) RMSDs of the imidazole group of histamine. C-D) Superposition of H<sub>3</sub>R-histamine models before MD simulations and 200 ns simulation snapshots of H<sub>3</sub>R pose (C) and H<sub>1</sub>R-like pose (D).

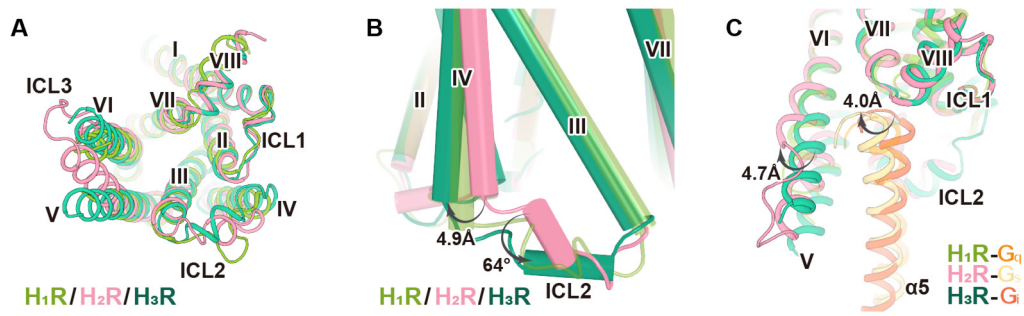

**Figure S6.** Structural comparison of histamine receptor-G complexes. A-B) Structural comparison of the cytoplasmic regions (A) and TM3-ICL2-TM4 regions (B) of H<sub>1</sub>R, H<sub>2</sub>R, and H<sub>3</sub>R structures. C) Comparison of the interface between the α5-helix and receptor cytoplasmic cavity of H<sub>1</sub>R-G<sub>q</sub>, H<sub>2</sub>R-G<sub>s</sub>, and H<sub>3</sub>R-G<sub>i</sub> complexes.

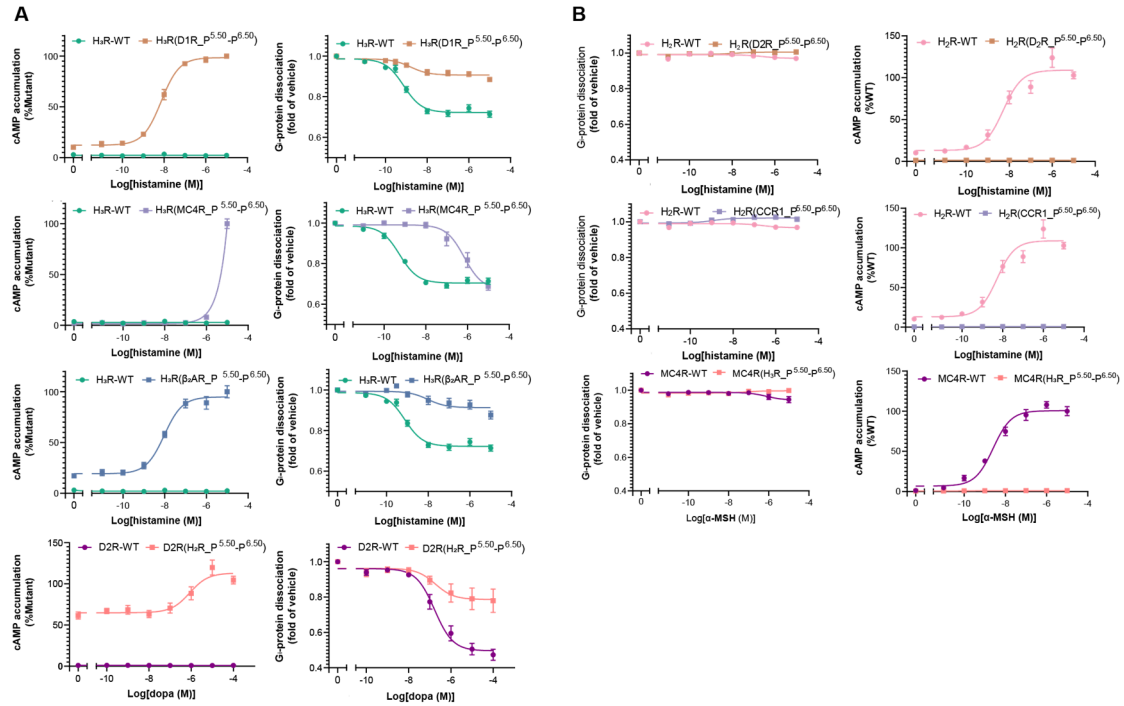

**Figure S7.** “TM5/TM6 swap” experiments in class A receptors. A-B) Dose-dependent curves for histamine induced cAMP accumulation and G-protein dissociation in HEK293 cells expressing chimera receptors (n=3). (A) The cAMP assay and NanoBit assay were performed on H<sub>3</sub>R(D1R\_P<sup>5.50</sup>-P<sup>6.50</sup>), H<sub>3</sub>R(MC4R\_P<sup>5.50</sup>-P<sup>6.50</sup>), H<sub>3</sub>R( $\beta$ AR\_P<sup>5.50</sup>-P<sup>6.50</sup>), and D2R(H<sub>2</sub>R\_P<sup>5.5</sup>-P<sup>6.5</sup>) to explore their G-protein selectivity. All chimera receptors gained the ability to activate the G<sub>s</sub> signal pathway and lost the ability to dissociate G<sub>i</sub>-protein. (B) The cAMP assay and NanoBit assay were performed on H<sub>2</sub>R(D2R\_P<sup>5.5</sup>-P<sup>6.5</sup>), H<sub>2</sub>R(CCR1\_P<sup>5.5</sup>-P<sup>6.5</sup>), and MC4R(H<sub>3</sub>R\_P<sup>5.5</sup>-P<sup>6.5</sup>) to explore their G-protein selectivity. All chimera receptors lost the ability to activate the G<sub>s</sub> signal pathway and did not gain the ability to dissociate G<sub>i</sub>-protein.

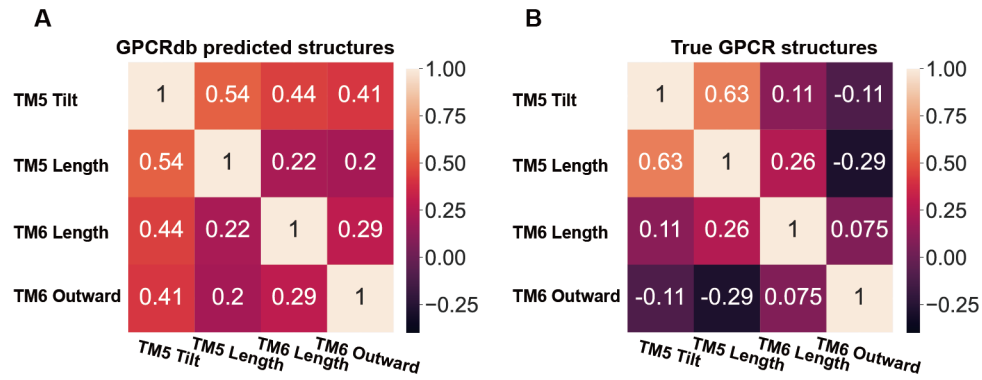

**Figure S8.** Correlation Matrix heatmaps. A-B) Heatmaps depicting the correlation matrix of GPCRdb structures (A) and True structures (B). Each element of the matrix represents the correlation between two features, with positive values indicating a positive correlation and vice versa. Notably, the TM6 Length in True structures exhibits a negative correlation with the TM5 tilt and TM5 Length, while in GPCRdb, they display a positive correlation.



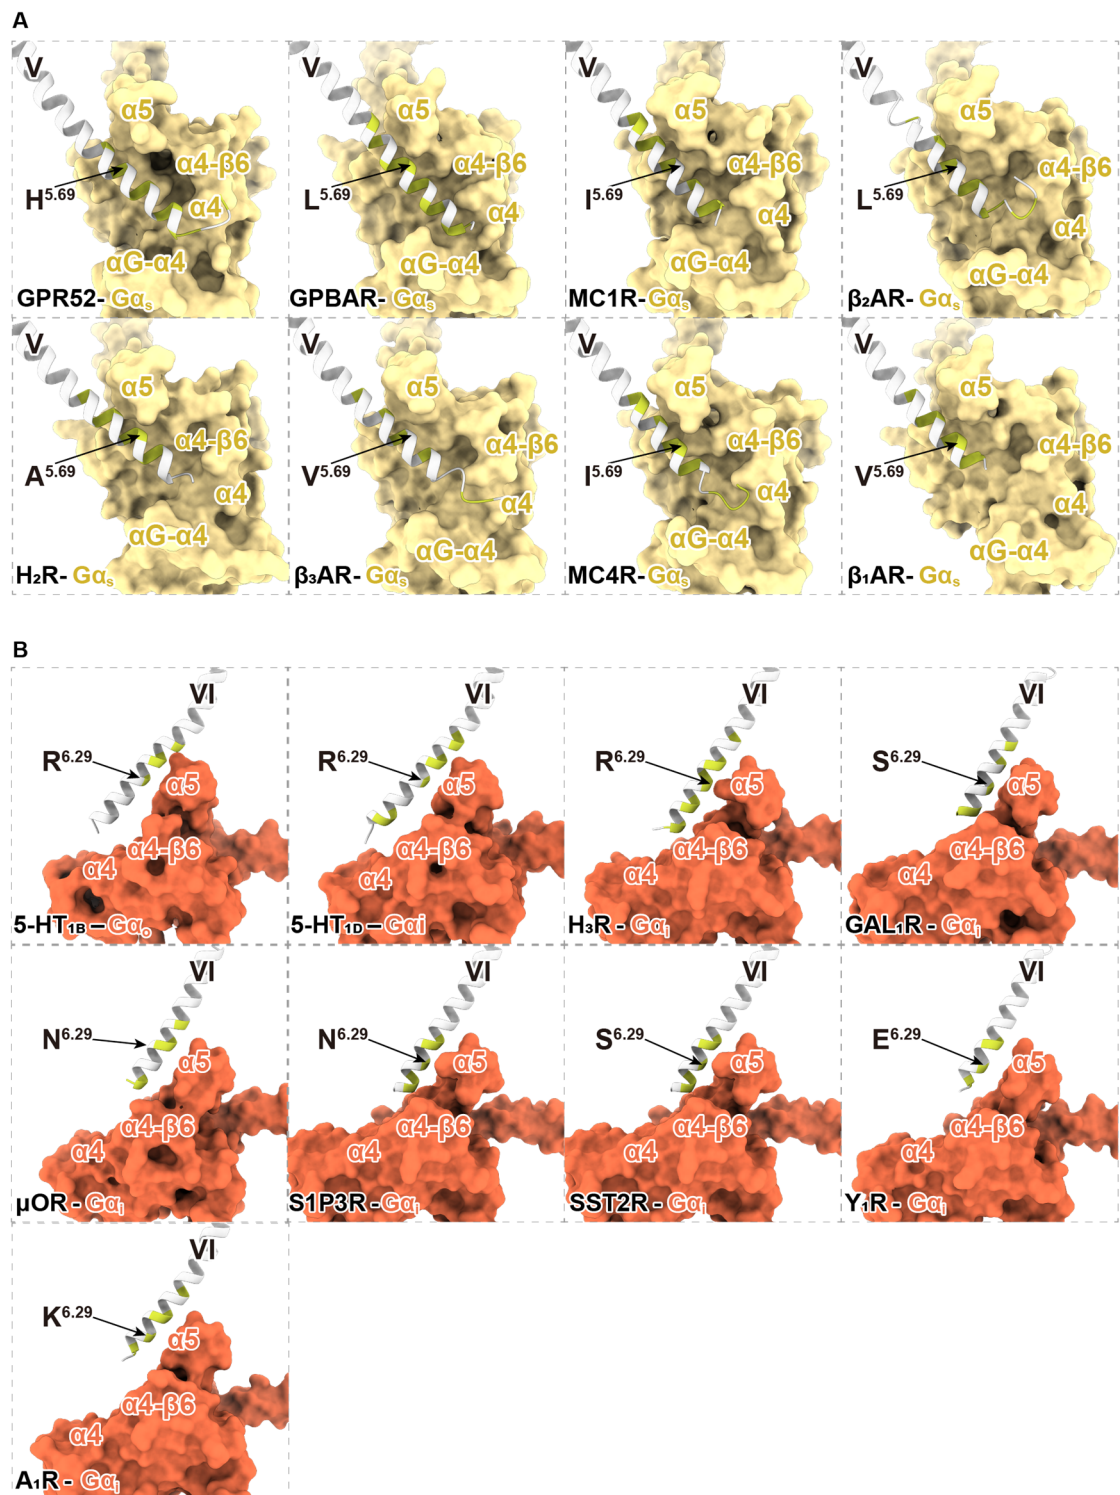

**Figure S9.** Interactions of  $G\alpha$  with TM5 or TM6. A) Binding surfaces of TM5 with  $G\alpha_s$  of  $G_s$ -coupled receptors. Extended helices of TM5 beyond 5.69 are indicated. Residues that interact with  $G\alpha$  are heightened in green. B) Binding surfaces of TM6 with  $G\alpha_i$  of  $G_i$ -coupled receptors. Extended helices of TM6 beyond 6.29 are indicated. Residues that interact with  $G\alpha$  are heightened in green.

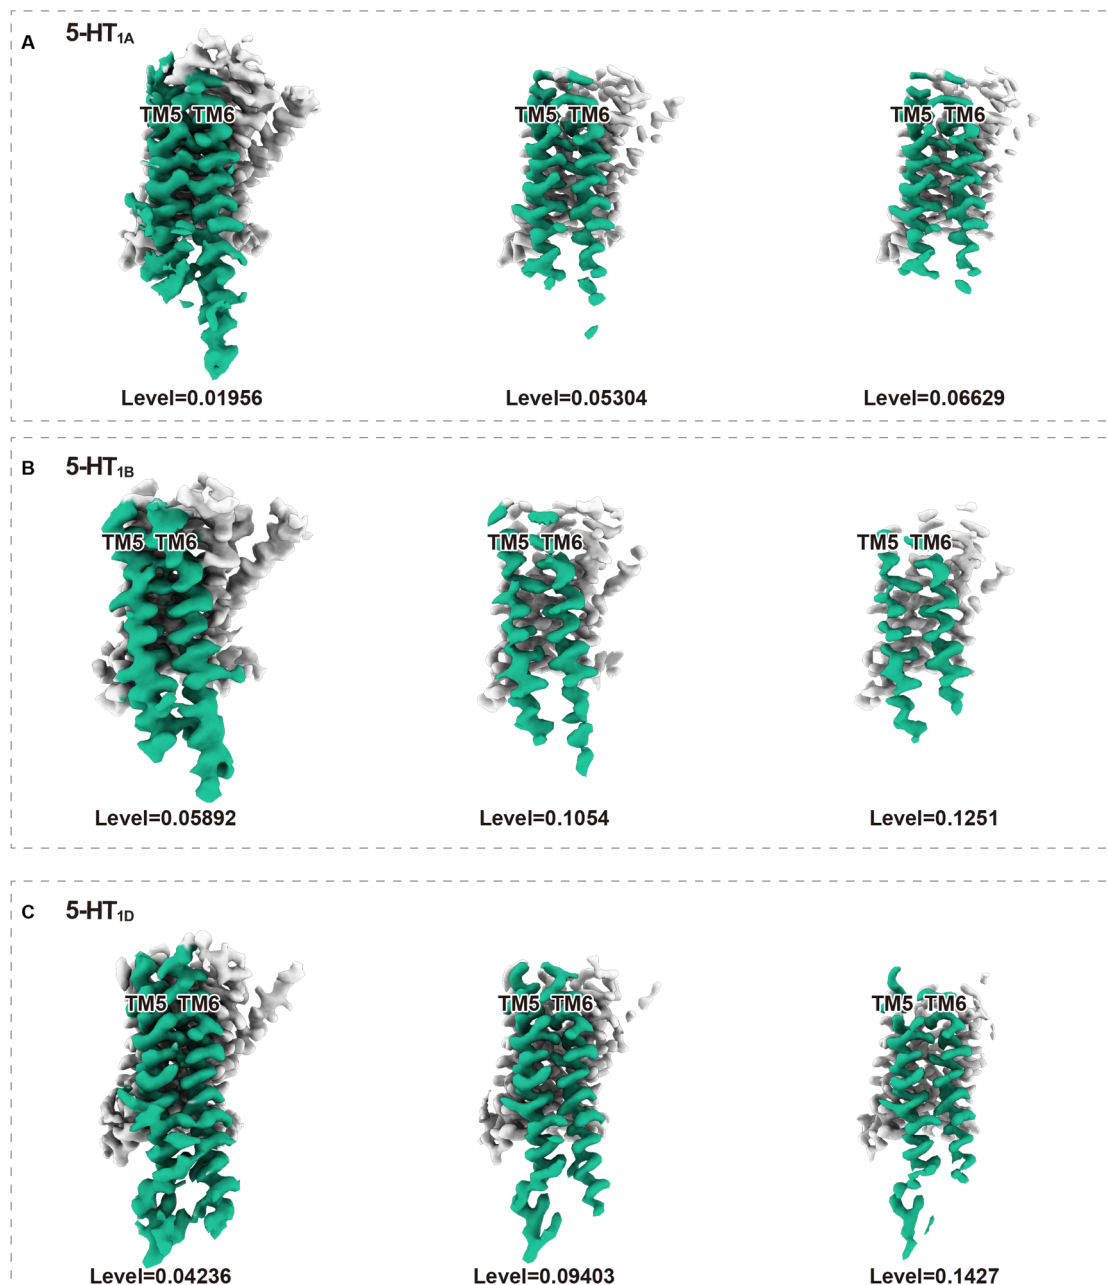

**Figure S10.** Cryo-EM density map of represent G<sub>i/o</sub>-coupled complexes. A) Cryo-EM density map of TM5/TM6 of 5-HT<sub>1A</sub> shown at the level of 0.01956, 0.05304, and 0.06629. B) Cryo-EM density map of TM5/TM6 of 5-HT<sub>1B</sub> shown at the level of 0.05892, 0.1054, and 0.1251. C) Cryo-EM density map of TM5/TM6 of 5-HT<sub>1D</sub> shown at the level of 0.04236, 0.09403, and 0.1427.

**Table S1.** Cryo-EM data collection, model refinement and validation statistics

|                                                     | Amathmine-H <sub>2</sub> R-G <sub>s</sub> | Histamine-H <sub>3</sub> R-G <sub>s</sub> | Immepip-H <sub>3</sub> R-G <sub>s</sub> |
|-----------------------------------------------------|-------------------------------------------|-------------------------------------------|-----------------------------------------|
| <b>Data collection and processing</b>               |                                           |                                           |                                         |
| Magnification                                       | 4,9310                                    | 4,9310                                    | 4,9310                                  |
| Voltage (kV)                                        | 300                                       | 300                                       | 300                                     |
| Electron exposure (e <sup>-</sup> /Å <sup>2</sup> ) | 62                                        | 62                                        | 62                                      |
| Defocus range (μm)                                  | -0.5 ~ -2.5                               | -0.5 ~ -2.5                               | -0.5 ~ -2.5                             |
| Pixel size (Å)                                      | 1.014                                     | 1.014                                     | 1.014                                   |
| Symmetry imposed                                    | C1                                        | C1                                        | C1                                      |
| Initial particle projections (no.)                  | 3,361,930                                 | 2,487,329                                 | 2,050,983                               |
| Final particle projections (no.)                    | 368,447                                   | 234,203                                   | 330,449                                 |
| Map resolution (Å)                                  | 2.7                                       | 2.7                                       | 3.0                                     |
| FSC threshold                                       | 0.143                                     | 0.143                                     | 0.143                                   |
| Map resolution range (Å)                            | 2.0-4.5                                   | 2.0-4.5                                   | 2.0-4.5                                 |
| <b>Refinement</b>                                   |                                           |                                           |                                         |
| Initial model used                                  | 7CFM                                      | 7E32                                      | 7E32                                    |
| Model resolution (Å)                                | 2.9                                       | 2.7                                       | 3.0                                     |
| FSC threshold                                       | 0.5                                       | 0.5                                       | 0.5                                     |
| Map sharpening <i>B</i> factor (Å <sup>2</sup> )    | -107.3                                    | -83.6                                     | -106.8                                  |
| <b>Model composition</b>                            |                                           |                                           |                                         |
| Non-hydrogen atoms                                  | 8229                                      | 9037                                      | 9102                                    |
| Protein residues                                    | 1041                                      | 1145                                      | 1145                                    |
| Lipid                                               | 1                                         | 1                                         | 1                                       |
| Water                                               | 0                                         | 0                                         | 0                                       |
| <b><i>B</i> factors (Å<sup>2</sup>)</b>             |                                           |                                           |                                         |
| Protein                                             | 38.85                                     | 55.81                                     | 61.61                                   |
| Lipids                                              | 59.48                                     | 101.56                                    | 86.71                                   |
| <b>R.m.s. deviations</b>                            |                                           |                                           |                                         |
| Bond lengths (Å)                                    | 0.005                                     | 0.005                                     | 0.015                                   |
| Bond angles (°)                                     | 0.771                                     | 0.824                                     | 1.450                                   |
| <b>Validation</b>                                   |                                           |                                           |                                         |
| MolProbity score                                    | 1.23                                      | 1.76                                      | 1.36                                    |
| Clashscore                                          | 4.57                                      | 10.27                                     | 4.57                                    |
| Rotamer outliers (%)                                | 0.00                                      | 0.00                                      | 0.00                                    |
| <b>Ramachandran plot</b>                            |                                           |                                           |                                         |
| Favored (%)                                         | 98.15                                     | 96.55                                     | 97.34                                   |
| Allowed (%)                                         | 1.85                                      | 3.45                                      | 2.66                                    |
| Disallowed (%)                                      | 0                                         | 0.00                                      | 0.00                                    |

**Table S2.** Effects of mutations on histamine receptors at ligand binding pocket (H<sub>2</sub>R-amthamine, H<sub>3</sub>R-histamine, and H<sub>3</sub>R-immepip respectively)

| amthamine                               | pEC50±SEM <sup>a,b</sup> | E <sub>max</sub> ±SEM <sup>a,b</sup> | n  | Expression (% WT) |
|-----------------------------------------|--------------------------|--------------------------------------|----|-------------------|
| H <sub>2</sub> R-WT                     | 8.78±0.26                | 99±1                                 | 3  | 100               |
| H <sub>2</sub> R-D98 <sup>3.32</sup> A  | ND                       | ND                                   | 3  | 107.67±7.02       |
| H <sub>2</sub> R-C102 <sup>3.36</sup> A | 6.79±0.17****            | 85.68±3.89                           | 3  | 109.16±1.33       |
| H <sub>2</sub> R-T103 <sup>3.37</sup> A | 6.19±0.66****            | 30.58±4.88***                        | 3  | 108.28±14.60      |
| H <sub>2</sub> R-D186 <sup>5.42</sup> A | 6.77±0.70****            | 38.55±4.58***                        | 3  | 106.01±4.38       |
| H <sub>2</sub> R-T190 <sup>5.46</sup> A | 8.36±0.44                | 65.30±3.72*                          | 3  | 103.19±6.21       |
| H <sub>2</sub> R-Y250 <sup>6.51</sup> A | 7.13±0.16****            | 84.89±4.44                           | 3  | 101.25±12.81      |
| H <sub>2</sub> R-F251 <sup>6.52</sup> A | 6.73±0.27****            | 71.61±11.60*                         | 3  | 110.04±2.67       |
| H <sub>2</sub> R-F254 <sup>6.55</sup> A | ND                       | ND                                   | 3  | 99.98±6.29        |
| H <sub>2</sub> R-L274 <sup>7.39</sup> A | 7.25±0.23****            | 108.91±8.24                          | 3  | 102.20±5.53       |
| amthamine                               | pEC50±SEM <sup>a,b</sup> | E <sub>max</sub> ±SEM <sup>a,b</sup> | n  | Expression (% WT) |
| H <sub>2</sub> R-WT                     | 7.91±0.06                | 99±1                                 | 3  | 100               |
| H <sub>2</sub> R-V99 <sup>3.33</sup> Y  | ND                       | ND                                   | 3  | 100.33±4.04       |
| H <sub>2</sub> R-D186 <sup>5.42</sup> T | ND                       | ND                                   | 3  | 183.75±19.71      |
| H <sub>2</sub> R-T190 <sup>5.46</sup> N | ND                       | ND                                   | 3  | 15.99±4.85        |
| histamine                               | pEC50±SEM <sup>a,b</sup> | E <sub>max</sub> ±SEM <sup>a,b</sup> | n  | Expression (% WT) |
| H <sub>3</sub> R-WT                     | 9.10±0.05                | -0.37±0.02                           | 19 | 100               |
| H <sub>3</sub> R-D114 <sup>3.32</sup> A | NR                       | NR                                   | 3  | 111.88±9.69       |
| H <sub>3</sub> R-Y115 <sup>3.33</sup> A | ND                       | ND                                   | 3  | 85.69±8.45        |
| H <sub>3</sub> R-C118 <sup>3.36</sup> A | ND                       | ND                                   | 3  | 108.43±7.25       |
| H <sub>3</sub> R-T119 <sup>3.37</sup> A | 8.87±0.11                | -0.31±0.02                           | 3  | 96.43±7.35        |
| H <sub>3</sub> R-E206 <sup>5.46</sup> A | NR                       | NR                                   | 3  | 97.49±6.65        |
| H <sub>3</sub> R-Y374 <sup>6.51</sup> A | ND                       | ND                                   | 4  | 91.57±5.13        |
| H <sub>3</sub> R-T375 <sup>6.52</sup> A | ND                       | ND                                   | 3  | 118.84±6.19       |
| H <sub>3</sub> R-F398 <sup>7.39</sup> A | ND                       | ND                                   | 5  | 98.59±2.45        |
| H <sub>3</sub> R-L401 <sup>7.42</sup> A | ND                       | ND                                   | 6  | 106.27±9.44       |
| H <sub>3</sub> R-W402 <sup>7.43</sup> A | NR                       | NR                                   | 4  | 88.47±6.65        |
| immepip                                 | pEC50±SEM <sup>a,b</sup> | E <sub>max</sub> ±SEM <sup>a,b</sup> | n  | Expression (% WT) |
| H <sub>3</sub> R-WT                     | 10.15±0.08               | -0.32±0.02                           | 13 | 100               |
| H <sub>3</sub> R-D114 <sup>3.32</sup> A | NR                       | NR                                   | 3  | 111.88±9.69       |
| H <sub>3</sub> R-Y115 <sup>3.33</sup> A | 10.02±0.09               | -0.33±0.04                           | 3  | 85.69±8.45        |
| H <sub>3</sub> R-C118 <sup>3.36</sup> A | 8.61±0.16****            | -0.31±0.04                           | 3  | 108.43±7.25       |
| H <sub>3</sub> R-T119 <sup>3.37</sup> A | 10.54±0.09*              | -0.25±0.03                           | 4  | 96.43±7.35        |
| H <sub>3</sub> R-E206 <sup>5.46</sup> A | NR                       | NR                                   | 3  | 97.49±6.65        |
| H <sub>3</sub> R-Y374 <sup>6.51</sup> A | 8.54±0.13****            | -0.32±0.03                           | 3  | 91.57±5.13        |
| H <sub>3</sub> R-T375 <sup>6.52</sup> A | 8.41±0.04****            | -0.46±0.08*                          | 3  | 118.84±6.19       |
| H <sub>3</sub> R-F398 <sup>7.39</sup> A | ND                       | ND                                   | 3  | 98.59±2.45        |
| H <sub>3</sub> R-L401 <sup>7.42</sup> A | 7.96±0.03****            | -0.30±0.04                           | 3  | 106.27±9.44       |
| H <sub>3</sub> R-W402 <sup>7.43</sup> A | ND                       | ND                                   | 3  | 88.47±6.65        |

<sup>a</sup> Data shown are means ± SEM from at least three independent experiments performed in technical triplicate. \*P<0.01; \*\*P<0.001 and \*\*\*P<0.0001 by one-way ANOVA followed by Dunnett's multiple comparisons test, compared with the response of the WT.

<sup>b</sup>The Emax is defined as the window between the maximal response and the vehicle. ND, not determinable, which refers to cannot be established over the tested concentration range, such that an Emax was not reached and therefore span could not be calculated. NR refers to no response (or response < 10% WT) occurred as the concentration of ligand changes.

**Table S3.** Structure-based sequence alignment of aminergic receptors at position 3.32 and 5.46

| Receptors |                    | Residues |      | Receptors |                 | Residues |      |
|-----------|--------------------|----------|------|-----------|-----------------|----------|------|
| Uniport   | IUPHAR             | 3.32     | 5.46 | Uniport   | IUPHAR          | 3.32     | 5.46 |
| 5HT1A     | 5-HT <sub>1A</sub> | D        | A    | ADA1B     | $\alpha_{1B}$   | D        | S    |
| 5HT1B     | 5-HT <sub>1B</sub> | D        | A    | ADA1D     | $\alpha_{1D}$   | D        | S    |
| 5HT1D     | 5-HT <sub>1D</sub> | D        | A    | ADA2A     | $\alpha_{2A}$   | D        | S    |
| 5HT1E     | 5-HT <sub>1E</sub> | D        | A    | ADA2B     | $\alpha_{2B}$   | D        | S    |
| 5HT1F     | 5-HT <sub>1F</sub> | D        | A    | ADA2C     | $\alpha_{2C}$   | D        | S    |
| 5HT2A     | 5-HT <sub>2A</sub> | D        | S    | ADRB1     | $\beta_1$       | D        | S    |
| 5HT2B     | 5-HT <sub>2B</sub> | D        | A    | ADRB2     | $\beta_2$       | D        | S    |
| 5HT2C     | 5-HT <sub>2C</sub> | D        | A    | ADRB3     | $\beta_3$       | D        | S    |
| 5HT4R     | 5-HT <sub>4</sub>  | D        | A    | DRD1      | D <sub>1</sub>  | D        | S    |
| 5HT5A     | 5-HT <sub>5A</sub> | D        | A    | DRD2      | D <sub>2</sub>  | D        | S    |
| 5HT6R     | 5-HT <sub>6</sub>  | D        | T    | DRD3      | D <sub>3</sub>  | D        | S    |
| 5HT7R     | 5-HT <sub>7</sub>  | D        | A    | DRD4      | D <sub>4</sub>  | D        | S    |
| ACM1      | M <sub>1</sub>     | D        | A    | DRD5      | D <sub>5</sub>  | D        | S    |
| ACM2      | M <sub>2</sub>     | D        | A    | HRH1      | H <sub>1</sub>  | D        | N    |
| ACM3      | M <sub>3</sub>     | D        | A    | HRH2      | H <sub>2</sub>  | D        | T    |
| ACM4      | M <sub>4</sub>     | D        | A    | HRH3      | H <sub>3</sub>  | D        | E    |
| ACM5      | M <sub>5</sub>     | D        | A    | HRH4      | H <sub>4</sub>  | D        | E    |
| ADA1A     | $\alpha_{1A}$      | D        | S    | TAAR1     | TA <sub>1</sub> | D        | S    |

**Table S4.** Effects of mutations of histamine receptors at 5.46 position

|                                         | <b>pEC50±SEM<sup>a,b</sup></b> | <b>E<sub>max</sub>±SEM<sup>a,b</sup></b> | <b>n</b> | <b>Expression<br/>(% WT)</b> |
|-----------------------------------------|--------------------------------|------------------------------------------|----------|------------------------------|
| H <sub>1</sub> R-WT                     | 6.01±0.16                      | -0.254±0.03                              | 4        | 100                          |
| H <sub>1</sub> R-N198 <sup>5.46</sup> E | ND                             | ND                                       | 4        | 102.40±8.92                  |
|                                         | <b>pEC50±SEM<sup>a,b</sup></b> | <b>E<sub>max</sub>±SEM<sup>a,b</sup></b> | <b>n</b> | <b>Expression<br/>(% WT)</b> |
| H <sub>3</sub> R-WT                     | 9.13±0.08                      | -0.39±0.04                               | 6        | 100                          |
| H <sub>3</sub> R-E206 <sup>5.46</sup> A | NR                             | NR                                       | 3        | 97.49±6.65                   |
| H <sub>3</sub> R-E206 <sup>5.46</sup> N | ND                             | ND                                       | 3        | 105.72±11.49                 |
| H <sub>3</sub> R-E206 <sup>5.46</sup> D | NR                             | NR                                       | 4        | 79.63±15.21                  |

<sup>a</sup> Data shown are means ± SEM from at least three independent experiments performed in technical triplicate. \*P<0.01; \*\*P<0.001 and \*\*\*P<0.0001 by one-way ANOVA followed by Dunnett's multiple comparisons test, compared with the response of the WT.

<sup>b</sup> The E<sub>max</sub> is defined as the window between the maximal response and the vehicle. ND, not determinable, which refers to cannot be established over the tested concentration range, such that an E<sub>max</sub> was not reached and therefore span could not be calculated. NR refers to no response (or response < 10% WT) occurred as the concentration of ligand changes.

**Table S5.** Characteristics of True GPCR datasets

| Primary G protein signaling | Receptors | PDB ID       | G $\alpha$ subtype | Last TM5 residue | Last TM5 number | Last TM6 residue | Las TM5 number | TM5 length | TM6 length | TM5 tilt | TM6 outward | Prediction Result |
|-----------------------------|-----------|--------------|--------------------|------------------|-----------------|------------------|----------------|------------|------------|----------|-------------|-------------------|
| G <sub>s</sub>              | DRD1      | 7JV5         | G $\alpha_s$       | 239              | 5.83            | 264              | 6.27           | 33         | 23         | 25.97    | 32.92       | TRUE              |
|                             | GPBAR     | 7CFN         | G $\alpha_s$       | 206              | 5.79            | 213              | 6.24           | 29         | 26         | 12.53    | 11.40       | TRUE              |
|                             | GPR52     | 6LI3         | G $\alpha_s$       | 243              | 5.79            | 266              | 6.36           | 29         | 14         | 22.43    | 18.73       | TRUE              |
|                             | MSHR      | 7F4H         | G $\alpha_s$       | 225              | 5.76            | 238              | 6.32           | 26         | 18         | 12.37    | 23.15       | TRUE              |
|                             | GPR3      |              | G $\alpha_s$       | 230              | 5.75            | 242              | 6.30           | 25         | 20         | 21.63    | 25.40       | TRUE              |
|                             | HRH2      |              | G $\alpha_s$       | 219              | 5.75            | 229              | 6.30           | 25         | 20         | 18.84    | 31.91       | TRUE              |
|                             | ADRB2     | 7DHI         | G $\alpha_s$       | 236              | 5.75            | 266              | 6.28           | 25         | 22         | 13.70    | 27.77       | TRUE              |
|                             | GPR6      |              | G $\alpha_s$       | 262              | 5.74            | 273              | 6.29           | 24         | 21         | 18.40    | 32.02       | TRUE              |
|                             | ADRB3     | 7DH5         | G $\alpha_s$       | 240              | 5.74            | 290              | 6.33           | 24         | 17         | 19.51    | 21.30       | TRUE              |
|                             | MC4R      | 7F53         | G $\alpha_s$       | 227              | 5.73            | 239              | 6.29           | 23         | 21         | 8.24     | 28.21       | TRUE              |
|                             | 5HT6R     | 7XTB         | G $\alpha_s$       | 223              | 5.73            | 264              | 6.31           | 23         | 19         | 9.10     | 26.36       | TRUE              |
|                             | GPR101    |              | G $\alpha_s$       | 226              | 5.72            | 397              | 6.33           | 22         | 17         | 16.21    | 23.20       | TRUE              |
|                             | ADRB1     | 7JJO         | G $\alpha_s$       | 241              | 5.72            | 284              | 6.29           | 22         | 21         | 10.68    | 28.87       | TRUE              |
|                             | 5HT7R     | 7XTC         | G $\alpha_s$       | 273              | 5.72            | 325              | 6.33           | 22         | 17         | 3.78     | 16.69       | FALSE             |
|                             | PE2R4     | 7D7M         | G $\alpha_s$       | 216              | 5.71            | 265              | 6.28           | 21         | 22         | 2.14     | 17.07       | FALSE             |
|                             | PE2R2     | 7CX3         | G $\alpha_s$       | 228              | 5.69            | 259              | 6.30           | 19         | 20         | 2.82     | 7.70        | FALSE             |
|                             | AA2AR     | 6GDG         | G $\alpha_s$       | 208              | 5.69            | 225              | 6.27           | 19         | 23         | 8.35     | 38.39       | TRUE              |
|                             | V2R       | 7DW9         | G $\alpha_s$       | 234              | 5.67            | 264              | 6.28           | 17         | 22         | 4.25     | 9.28        | FALSE             |
| FSHR                        | 8I2G      | G $\alpha_s$ | 556                | 5.65             | 564             | 6.27             | 15             | 23         | 7.21       | 32.84    | TRUE        |                   |
| LSHR                        | 7FIH      | G $\alpha_s$ | 553                | 5.65             | 564             | 6.30             | 15             | 20         | 7.64       | 23.30    | FALSE       |                   |
| G <sub>i/o</sub>            | 5HT1A     | 7E2Y         | G $\alpha_{i1}$    | 227              | 5.70            | 325              | 6.15           | 20         | 35         | 5.61     | 28.81       | TRUE              |
|                             | 5HT1B     | 6G79m        | G $\alpha_o$       | 241              | 5.71            | 298              | 6.19           | 21         | 31         | 10.02    | 25.66       | TRUE              |
|                             | 5HT1D     | 7E32         | G $\alpha_{i1}$    | 229              | 5.70            | 285              | 6.19           | 20         | 31         | 5.61     | 27.09       | TRUE              |
|                             | HRH3      |              | G $\alpha_{i1}$    | 234              | 5.74            | 344              | 6.21           | 24         | 29         | 0.00     | 20.82       | TRUE              |
|                             | OPRM      | 6DDE         | G $\alpha_{i1}$    | 261              | 5.65            | 270              | 6.23           | 15         | 27         | 5.99     | 19.86       | TRUE              |
|                             | GALR1     | 7WQ3         | G $\alpha_{i1}$    | 230              | 5.68            | 235              | 6.23           | 18         | 27         | 2.73     | 13.16       | TRUE              |
|                             | S1PR3     | 7EW2         | G $\alpha_{i1}$    | 228              | 5.71            | 232              | 6.24           | 21         | 26         | 4.64     | 12.85       | TRUE              |



|        |      |                |     |      |     |      |    |    |       |       |      |
|--------|------|----------------|-----|------|-----|------|----|----|-------|-------|------|
| SSR2   | 7T10 | $G\alpha_{i3}$ | 237 | 5.67 | 245 | 6.24 | 17 | 26 | 3.95  | 23.20 | TRUE |
| AA1R   | 7LD3 | $G\alpha_{i2}$ | 212 | 5.70 | 225 | 6.26 | 20 | 24 | 4.57  | 25.27 | TRUE |
| NPY1R  | 7VGX | $G\alpha_{i1}$ | 245 | 5.72 | 254 | 6.26 | 22 | 24 | 10.50 | 20.08 | TRUE |
| S1PR5  | 7EW1 | $G\alpha_{i1}$ | 222 | 5.68 | 243 | 6.27 | 18 | 23 | 4.59  | 28.17 | TRUE |
| ADA2B  | 6K41 | $G\alpha_o$    | 202 | 5.68 | 363 | 6.27 | 18 | 23 | 6.14  | 25.49 | TRUE |
| CCR5   | 7F1S | $G\alpha_{i1}$ | 220 | 5.64 | 227 | 6.27 | 14 | 23 | 6.73  | 16.41 | TRUE |
| CCR2   | 7XA3 | $G\alpha_{i1}$ | 231 | 5.67 | 235 | 6.27 | 17 | 23 | 10.40 | 18.26 | TRUE |
| CNR1   | 6N4B | $G\alpha_{i1}$ | 310 | 5.74 | 336 | 6.28 | 24 | 22 | 4.20  | 13.30 | TRUE |
| ACM2   | 6OIK | $G\alpha_o$    | 212 | 5.64 | 380 | 6.28 | 14 | 22 | 3.23  | 20.91 | TRUE |
| DRD2   | 7JVR | $G\alpha_{i1}$ | 224 | 5.73 | 366 | 6.28 | 23 | 22 | 9.43  | 14.71 | TRUE |
| DRD3   | 7CMV | $G\alpha_{i1}$ | 222 | 5.72 | 322 | 6.28 | 22 | 22 | 6.12  | 16.51 | TRUE |
| 5HT1F  | 7EXD | $G\alpha_{i1}$ | 212 | 5.69 | 286 | 6.28 | 19 | 22 | 5.72  | 27.13 | TRUE |
| CNR2   | 6PT0 | $G\alpha_{i1}$ | 227 | 5.76 | 238 | 6.28 | 26 | 22 | 7.92  | 12.98 | TRUE |
| 5HT1E  | 7E33 | $G\alpha_{i1}$ | 211 | 5.67 | 284 | 6.28 | 17 | 22 | 10.44 | 16.21 | TRUE |
| CCR1   | 7VL9 | $G\alpha_{i1}$ | 227 | 5.66 | 232 | 6.28 | 16 | 22 | 3.77  | 21.75 | TRUE |
| CCR3   | 7X9Y | $G\alpha_{i1}$ | 228 | 5.67 | 232 | 6.28 | 17 | 22 | 11.54 | 13.97 | TRUE |
| HCAR2  | 8J6P | $G\alpha_{i1}$ | 217 | 5.67 | 224 | 6.28 | 17 | 22 | 3.09  | 14.75 | TRUE |
| S1PR1  | 7TD4 | $G\alpha_{i1}$ | 234 | 5.71 | 249 | 6.28 | 21 | 22 | 3.23  | 16.44 | TRUE |
| LPAR1  | 7TD0 | $G\alpha_{i1}$ | 236 | 5.69 | 252 | 6.29 | 19 | 21 | 4.77  | 17.64 | TRUE |
| CCR6   | 6WWZ | $G\alpha_o$    | 241 | 5.65 | 249 | 6.30 | 15 | 20 | 2.55  | 8.92  | TRUE |
| CXCR2  | 6LFO | $G\alpha_{i1}$ | 240 | 5.67 | 246 | 6.30 | 17 | 20 | 9.71  | 6.51  | TRUE |
| MRGX2  | 7S8M | $G\alpha_{i1}$ | 212 | 5.68 | 218 | 6.30 | 18 | 20 | 3.71  | 19.61 | TRUE |
| MTR1A  | 7DB6 | $G\alpha_{i1}$ | 216 | 5.67 | 234 | 6.31 | 17 | 19 | 3.51  | 49.34 | TRUE |
| FPR1   | 7T6T | $G\alpha_{i1}$ | 231 | 5.68 | 237 | 6.31 | 18 | 19 | 8.99  | 17.80 | TRUE |
| FPR2   | 6OMM | $G\alpha_{i1}$ | 231 | 5.68 | 238 | 6.32 | 18 | 18 | 3.33  | 15.21 | TRUE |
| Q3KSP2 | 7JHJ | $G\alpha_{i1}$ | 211 | 5.64 | 222 | 6.32 | 14 | 18 | 5.65  | 24.28 | TRUE |
| GPR88  | 7EJX | $G\alpha_{i1}$ | 228 | 5.74 | 283 | 6.34 | 24 | 16 | 8.26  | 17.72 | TRUE |

---

**Table S6.** Effects of swap of H<sub>2</sub>R/H<sub>3</sub>R with other GPCRs

| <b>G<sub>i</sub>-protein dissociation</b>                                 |                                |                                          |          |                          |
|---------------------------------------------------------------------------|--------------------------------|------------------------------------------|----------|--------------------------|
|                                                                           | <b>pEC50±SEM<sup>a,b</sup></b> | <b>E<sub>max</sub>±SEM<sup>a,b</sup></b> | <b>n</b> | <b>Expression (% WT)</b> |
| H <sub>2</sub> R-WT                                                       | NR                             | NR                                       | 4        | 100                      |
| H <sub>2</sub> R(H <sub>3</sub> R_F <sup>5.56</sup> -F <sup>6.44</sup> )  | NR                             | NR                                       | 3        | 29.23±4.01               |
| H <sub>2</sub> R(D <sub>2</sub> R_P <sup>5.50</sup> -P <sup>6.50</sup> )  | NR                             | NR                                       | 3        | 35.58±8.07               |
| H <sub>2</sub> R(CCR1_P <sup>5.50</sup> -P <sup>6.50</sup> )              | NR                             | NR                                       | 3        | 34.40±4.41               |
|                                                                           | <b>pEC50±SEM<sup>a,b</sup></b> | <b>E<sub>max</sub>±SEM<sup>a,b</sup></b> | <b>n</b> | <b>Expression (% WT)</b> |
| MC4R-WT                                                                   | NR                             | NR                                       | 3        | 100                      |
| MC4R(H <sub>3</sub> R_P <sup>5.50</sup> -P <sup>6.50</sup> )              | NR                             | NR                                       | 3        | 65.09±12.42              |
| <b>G<sub>s</sub>-signal pathway activation</b>                            |                                |                                          |          |                          |
|                                                                           | <b>pEC50±SEM<sup>a,b</sup></b> | <b>E<sub>max</sub>±SEM<sup>a,b</sup></b> | <b>n</b> | <b>Expression (% WT)</b> |
| H <sub>2</sub> R-WT                                                       | 8.26±0.07                      | 99±1                                     | 4        | 100                      |
| H <sub>2</sub> R(H <sub>3</sub> R_F <sup>5.56</sup> -F <sup>6.44</sup> )  | NR                             | NR                                       | 3        | 29.23±4.01               |
| H <sub>2</sub> R(D <sub>1</sub> R_P <sup>5.50</sup> -P <sup>6.50</sup> )  | NR                             | NR                                       | 3        | 35.58±8.07               |
| H <sub>2</sub> R(CCR1_P <sup>5.50</sup> -P <sup>6.50</sup> )              | NR                             | NR                                       | 3        | 34.40±4.41               |
|                                                                           | <b>pEC50±SEM<sup>a,b</sup></b> | <b>E<sub>max</sub>±SEM<sup>a,b</sup></b> | <b>n</b> | <b>Expression (% WT)</b> |
| MC4R-WT                                                                   | 8.55±0.11                      | 99±1                                     | 3        | 100                      |
| MC4R(H <sub>3</sub> R_P <sup>5.50</sup> -P <sup>6.50</sup> )              | NR                             | NR                                       | 3        | 65.09±12.42              |
| <b>G<sub>s</sub>-signal pathway activation</b>                            |                                |                                          |          |                          |
|                                                                           | <b>pEC50±SEM<sup>a,b</sup></b> | <b>E<sub>max</sub>±SEM<sup>a,b</sup></b> | <b>n</b> | <b>Expression (% WT)</b> |
| H <sub>3</sub> R-WT                                                       | NR                             | NR                                       | 3        | 100                      |
| H <sub>3</sub> R(H <sub>2</sub> R_P <sup>5.50</sup> -P <sup>6.50</sup> )  | 7.86±0.11                      | 99±1                                     | 3        | 37.32±7.34               |
| H <sub>3</sub> R(D <sub>1</sub> R_P <sup>5.50</sup> -P <sup>6.50</sup> )  | 8.10±0.19                      | 99±1                                     | 3        | 54.17±6.30               |
| H <sub>3</sub> R(MC4R_P <sup>5.50</sup> -P <sup>6.50</sup> )              | ND                             | ND                                       | 3        | 58.44±6.64               |
| H <sub>3</sub> R(β <sub>2</sub> AR_P <sup>5.50</sup> -P <sup>6.50</sup> ) | 8.05±0.04                      | 99±1                                     | 3        | 52.00±6.25               |
|                                                                           | <b>pEC50±SEM<sup>a,b</sup></b> | <b>E<sub>max</sub>±SEM<sup>a,b</sup></b> | <b>n</b> | <b>Expression (% WT)</b> |
| D <sub>2</sub> R-WT                                                       | NR                             | NR                                       | 3        | 100                      |
| D <sub>2</sub> R(H <sub>2</sub> R_P <sup>5.50</sup> -P <sup>6.50</sup> )  | -6.10±0.02                     | 99±1                                     | 3        | 23.65±0.12               |
| <b>G<sub>i</sub>-protein dissociation</b>                                 |                                |                                          |          |                          |
|                                                                           | <b>pEC50±SEM<sup>a,b</sup></b> | <b>E<sub>max</sub>±SEM<sup>a,b</sup></b> | <b>n</b> | <b>Expression (% WT)</b> |
| H <sub>3</sub> R-WT                                                       | 9.14±0.10                      | -0.40±0.04                               | 7        | 100                      |
| H <sub>3</sub> R(H <sub>2</sub> R_P <sup>5.50</sup> -P <sup>6.50</sup> )  | 9.35±0.24                      | -0.18±0.02**                             | 3        | 37.32±7.34               |
| H <sub>3</sub> R(D <sub>1</sub> R_P <sup>5.50</sup> -P <sup>6.50</sup> )  | 8.69±0.15                      | -0.09±0.02***                            | 4        | 54.17±6.30               |
| H <sub>3</sub> R(MC4R_P <sup>5.50</sup> -P <sup>6.50</sup> )              | 5.76±0.10****                  | -0.35±0.02                               | 3        | 58.44±6.64               |
| H <sub>3</sub> R(β <sub>2</sub> AR_P <sup>5.50</sup> -P <sup>6.50</sup> ) | -8.60±0.29                     | -0.21±0.06**                             | 3        | 52.00±6.25               |
|                                                                           | <b>pEC50±SEM<sup>a,b</sup></b> | <b>E<sub>max</sub>±SEM<sup>a,b</sup></b> | <b>n</b> | <b>Expression (% WT)</b> |
| D <sub>2</sub> R-WT                                                       | 6.88±0.30                      | -0.50±0.06                               | 4        | 100                      |
| D <sub>2</sub> R(H <sub>2</sub> R_P <sup>5.50</sup> -P <sup>6.50</sup> )  | 6.72±0.16                      | -0.30±0.08                               | 3        | 23.65±0.12               |

<sup>a</sup> Data shown are means ± SEM from at least three independent experiments performed in technical triplicate. \*P<0.01;

\*\*P<0.001 and \*\*\*P<0.0001 by one-way ANOVA followed by Dunnett's multiple comparisons test, compared with the response of the WT.

<sup>b</sup>The Emax is defined as the window between the maximal response and the vehicle. ND, not determinable, which refers to cannot be established over the tested concentration range, such that an Emax was not reached and therefore span could not be calculated. NR refers to no response (or response < 10% WT) occurred as the concentration of ligand changes.

**Table S7.** Characteristics of activated GPCR structures from GPCRdb datasets

| Primary G protein signaling | Uniport | Last TM5 residue | Last TM5 number | Last TM6 residue | Last TM5 number | TM5 length | TM6 length | TM5 tilt | TM6 outward |
|-----------------------------|---------|------------------|-----------------|------------------|-----------------|------------|------------|----------|-------------|
| G <sub>s</sub>              | 5HT4R   | 236              | 5.82            | 249              | 6.25            | 32         | 25         | 22.89    | 34.74       |
|                             | 5HT6R   | 225              | 5.75            | 257              | 6.24            | 25         | 26         | 4.88     | 26.00       |
|                             | 5HT7R   | 274              | 5.73            | 316              | 6.24            | 23         | 26         | 6.05     | 25.46       |
|                             | AA2AR   | 213              | 5.74            | 219              | 6.21            | 24         | 29         | 13.12    | 4.38        |
|                             | AA2BR   | 218              | 5.74            | 223              | 6.24            | 24         | 26         | 7.71     | 3.81        |
|                             | ACTHR   | 203              | 5.68            | 209              | 6.25            | 18         | 25         | 5.59     | 28.70       |
|                             | ADRB1   | 260              | 5.74            | 313              | 6.24            | 24         | 26         | 4.06     | 30.70       |
|                             | ADRB2   | 236              | 5.75            | 262              | 6.24            | 25         | 26         | 6.35     | 36.78       |
|                             | ADRB3   | 242              | 5.76            | 282              | 6.25            | 26         | 25         | 23.68    | 25.31       |
|                             | FSHR    | 556              | 5.65            | 564              | 6.27            | 15         | 23         | 5.73     | 26.58       |
|                             | HRH2    | 216              | 5.72            | 222              | 6.30            | 22         | 20         | 6.85     | 26.97       |
|                             | LPAR6   | 212              | 5.66            | 219              | 6.25            | 16         | 25         | 8.03     | 16.65       |
|                             | MC3R    | 221              | 5.72            | 234              | 6.27            | 22         | 23         | 9.23     | 30.64       |
|                             | MC5R    | 220              | 5.73            | 232              | 6.29            | 23         | 21         | 3.73     | 4.67        |
|                             | MSHR    | 221              | 5.72            | 235              | 6.29            | 22         | 21         | 5.57     | 28.38       |
|                             | PD2R    | 241              | 5.79            | 255              | 6.25            | 29         | 25         | 1.76     | 8.78        |
|                             | TAAR1   | 231              | 5.79            | 241              | 6.25            | 29         | 25         | 20.90    | 35.70       |
|                             | TAAR2   | 243              | 5.72            | 250              | 6.23            | 22         | 27         | 13.03    | 26.36       |
|                             | TAAR3   | 237              | 5.78            | 245              | 6.24            | 28         | 26         | 14.09    | 25.91       |
|                             | TAAR5   | 233              | 5.72            | 238              | 6.21            | 22         | 29         | 9.77     | 19.54       |
| TAAR6                       | 239     | 5.80             | 246             | 6.23             | 30              | 27         | 14.79      | 31.63    |             |
| TAAR8                       | 237     | 5.79             | 246             | 6.24             | 29              | 26         | 11.21      | 23.88    |             |
| TAAR9                       | 238     | 5.79             | 246             | 6.23             | 29              | 27         | 17.29      | 51.64    |             |
| TSHR                        | 609     | 5.66             | 616             | 6.27             | 16              | 23         | 5.90       | 26.43    |             |
| G <sub>i/o</sub>            | 5HT5A   | 235              | 5.73            | 274              | 6.24            | 23         | 26         | 3.62     | 24.90       |
|                             | AA3R    | 211              | 5.72            | 218              | 6.23            | 22         | 27         | 6.17     | 29.07       |
|                             | ADA2A   | 247              | 5.74            | 377              | 6.23            | 24         | 27         | 9.70     | 30.53       |
|                             | ADA2C   | 247              | 5.75            | 371              | 6.24            | 25         | 26         | 18.09    | 28.24       |
|                             | AGTR2   | 240              | 5.67            | 246              | 6.25            | 17         | 25         | 4.80     | 24.54       |
|                             | APJ     | 235              | 5.72            | 243              | 6.30            | 22         | 20         | 11.09    | 20.51       |
|                             | C3AR    | 365              | 5.67            | 373              | 6.31            | 17         | 19         | 3.53     | 20.71       |
|                             | C5AR1   | 231              | 5.67            | 238              | 6.31            | 17         | 19         | 3.25     | 20.03       |
|                             | CCR10   | 234              | 5.65            | 241              | 6.29            | 15         | 21         | 3.81     | 6.57        |
|                             | CCR1    | 228              | 5.67            | 232              | 6.28            | 17         | 22         | 9.53     | 18.30       |
|                             | CCR2    | 231              | 5.67            | 237              | 6.29            | 17         | 21         | 9.93     | 17.96       |
|                             | CCR3    | 228              | 5.67            | 232              | 6.28            | 17         | 22         | 9.77     | 18.91       |
|                             | CCR4    | 231              | 5.67            | 235              | 6.28            | 17         | 22         | 10.28    | 16.46       |
|                             | CCR7    | 250              | 5.65            | 258              | 6.30            | 15         | 20         | 1.19     | 6.20        |
|                             | CCR8    | 227              | 5.67            | 231              | 6.28            | 17         | 22         | 10.73    | 17.77       |
|                             | CCR9    | 241              | 5.65            | 249              | 6.30            | 15         | 20         | 2.68     | 9.08        |
|                             | CLTR1   | 218              | 5.67            | 224              | 6.26            | 17         | 24         | 8.25     | 19.58       |
|                             | CML1    | 249              | 5.67            | 256              | 6.31            | 17         | 19         | 3.06     | 20.25       |
|                             | CX3C1   | 220              | 5.67            | 224              | 6.28            | 17         | 22         | 9.53     | 16.70       |
|                             | CXCR1   | 231              | 5.67            | 237              | 6.30            | 17         | 20         | 9.54     | 6.26        |
| CXCR3                       | 244     | 5.67             | 250             | 6.30             | 17              | 20         | 12.18      | 8.89     |             |

|       |     |      |     |      |    |    |       |       |
|-------|-----|------|-----|------|----|----|-------|-------|
| CXCR4 | 226 | 5.65 | 235 | 6.31 | 15 | 19 | 2.85  | 7.17  |
| CXCR5 | 247 | 5.67 | 254 | 6.30 | 17 | 20 | 11.20 | 8.86  |
| CXCR6 | 218 | 5.65 | 226 | 6.30 | 15 | 20 | 1.87  | 6.83  |
| DRD4  | 229 | 5.75 | 385 | 6.26 | 25 | 24 | 6.29  | 20.22 |
| EDNRA | 288 | 5.71 | 296 | 6.29 | 21 | 21 | 1.63  | 18.78 |
| EDNRB | 307 | 5.72 | 313 | 6.25 | 22 | 25 | 4.24  | 19.53 |
| FFAR2 | 208 | 5.67 | 214 | 6.27 | 17 | 23 | 7.39  | 18.92 |
| FFAR3 | 213 | 5.67 | 219 | 6.29 | 17 | 21 | 3.47  | 14.32 |
| FFAR4 | 244 | 5.75 | 269 | 6.24 | 25 | 26 | 6.63  | 18.86 |
| FPR1  | 230 | 5.67 | 237 | 6.31 | 17 | 19 | 3.49  | 20.50 |
| FPR2  | 231 | 5.68 | 238 | 6.32 | 18 | 18 | 10.42 | 20.82 |
| FPR3  | 230 | 5.67 | 237 | 6.31 | 17 | 19 | 2.93  | 20.16 |
| GALR1 | 234 | 5.72 | 242 | 6.30 | 22 | 20 | 9.86  | 17.03 |
| GALR3 | 215 | 5.69 | 224 | 6.24 | 19 | 26 | 7.53  | 12.90 |
| HCAR1 | 205 | 5.67 | 212 | 6.27 | 17 | 23 | 3.65  | 14.14 |
| HCAR2 | 216 | 5.66 | 222 | 6.26 | 16 | 24 | 4.30  | 14.54 |
| HCAR3 | 216 | 5.66 | 223 | 6.27 | 16 | 23 | 3.60  | 14.27 |
| HRH4  | 209 | 5.73 | 293 | 6.25 | 23 | 25 | 4.74  | 24.27 |
| LPAR1 | 239 | 5.72 | 247 | 6.24 | 22 | 26 | 9.91  | 23.10 |
| LPAR2 | 224 | 5.74 | 229 | 6.23 | 24 | 27 | 7.38  | 23.97 |
| LPAR3 | 220 | 5.72 | 228 | 6.24 | 22 | 26 | 9.48  | 22.44 |
| LT4R1 | 211 | 5.68 | 217 | 6.31 | 18 | 19 | 8.24  | 18.96 |
| LT4R2 | 241 | 5.67 | 245 | 6.25 | 17 | 25 | 9.19  | 10.28 |
| MTR1B | 234 | 5.72 | 240 | 6.24 | 22 | 26 | 9.14  | 57.43 |
| NPBW1 | 231 | 5.66 | 240 | 6.24 | 16 | 26 | 6.18  | 16.66 |
| NPBW2 | 242 | 5.68 | 249 | 6.24 | 18 | 26 | 7.85  | 12.55 |
| NPFF1 | 245 | 5.67 | 258 | 6.23 | 17 | 27 | 14.86 | 20.75 |
| NPFF2 | 356 | 5.73 | 365 | 6.24 | 23 | 26 | 15.42 | 18.77 |
| NPY1R | 245 | 5.72 | 250 | 6.22 | 22 | 28 | 13.39 | 17.68 |
| NPY2R | 250 | 5.69 | 257 | 6.24 | 19 | 26 | 12.36 | 17.78 |
| NPY4R | 246 | 5.70 | 255 | 6.25 | 20 | 25 | 14.05 | 14.48 |
| OPRD  | 245 | 5.70 | 250 | 6.24 | 20 | 26 | 6.72  | 18.06 |
| OPRK  | 254 | 5.66 | 262 | 6.23 | 16 | 27 | 4.46  | 15.24 |
| OPRX  | 244 | 5.67 | 251 | 6.23 | 17 | 27 | 4.24  | 14.33 |
| OXER1 | 280 | 5.66 | 288 | 6.28 | 16 | 22 | 3.77  | 11.42 |
| P2Y12 | 223 | 5.72 | 230 | 6.29 | 22 | 21 | 16.36 | 9.17  |
| P2Y13 | 241 | 5.71 | 252 | 6.32 | 21 | 18 | 19.75 | 6.64  |
| P2Y14 | 219 | 5.71 | 228 | 6.30 | 21 | 20 | 11.67 | 13.10 |
| PD2R2 | 236 | 5.68 | 242 | 6.31 | 18 | 19 | 2.26  | 21.75 |
| PE2R3 | 264 | 5.73 | 271 | 6.24 | 23 | 26 | 4.60  | 12.55 |
| PTAFR | 215 | 5.67 | 220 | 6.23 | 17 | 27 | 9.96  | 15.93 |
| QRFPR | 255 | 5.79 | 263 | 6.25 | 29 | 25 | 29.11 | 15.63 |
| RL3R1 | 308 | 5.79 | 315 | 6.24 | 29 | 26 | 16.51 | 16.37 |
| RL3R2 | 233 | 5.67 | 239 | 6.28 | 17 | 22 | 7.55  | 18.65 |
| S1PR3 | 228 | 5.71 | 232 | 6.24 | 21 | 26 | 3.80  | 9.12  |
| S1PR4 | 233 | 5.68 | 239 | 6.23 | 18 | 27 | 8.85  | 16.72 |
| SSR1  | 252 | 5.67 | 259 | 6.23 | 17 | 27 | 5.95  | 14.60 |
| SSR2  | 236 | 5.66 | 244 | 6.23 | 16 | 27 | 0.31  | 13.31 |
| SSR3  | 239 | 5.71 | 247 | 6.25 | 21 | 25 | 6.81  | 14.64 |

|       |     |      |     |      |    |    |       |       |
|-------|-----|------|-----|------|----|----|-------|-------|
| SSR4  | 240 | 5.67 | 247 | 6.23 | 17 | 27 | 5.02  | 13.76 |
| SSR5  | 234 | 5.71 | 244 | 6.31 | 21 | 19 | 7.30  | 2.12  |
| SUCR1 | 216 | 5.67 | 221 | 6.24 | 17 | 26 | 8.38  | 9.00  |
| XCR1  | 214 | 5.67 | 219 | 6.29 | 17 | 21 | 10.55 | 7.21  |

---

**Table S8.** Comparison of classifiers trained on the standardized geometries (TM5 length, TM5 tilt, TM6 outward) with and without labels shuffled

|                             | no PCA <sup>b</sup>     |        |        |          |        |         |
|-----------------------------|-------------------------|--------|--------|----------|--------|---------|
|                             | precision <sup>c</sup>  | recall | f1     | accuracy | AUC    | MCC     |
| Training Phase <sup>a</sup> | 77.43%                  | 75.82% | 0.7463 | 82.31%   | 0.8910 | 0.5285  |
| Testing Phase               | 93.59%                  | 87.50% | 0.8943 | 90.74%   | 0.8162 | 0.8086  |
|                             | no PCA, labels shuffled |        |        |          |        |         |
|                             | precision               | recall | f1     | accuracy | AUC    | MCC     |
| Training Phase              | 42.12%                  | 49.29% | 0.4457 | 71.95%   | 0.4489 | -0.0140 |
| Testing Phase               | 47.25%                  | 49.74% | 0.4192 | 61.33%   | 0.3485 | -0.0127 |

<sup>a</sup>For the training phase, the average metrics in 25 repeats of 10-fold cross-validation are reported. For the testing phase, the best result is reported.

<sup>b</sup>The final model is trained on the three raw features (TM6 length excluded) of the GPCRdb dataset rather than in the PCA space.

<sup>c</sup>The precision, recall and f1-score are reported in macro average. The AUC is the Area-Under-Curve (AUC) of Receiver Operating Characteristic (ROC) curve. The MCC is the Matthews Correlation Coefficient.

**Table S9.** Enlarged interact area by extended TM5 or TM6

| Primary G protein signaling | Receptors | PDB ID | Extended TM5 length<br>(below 5.69) | Extended TM6 length<br>(below 6.29) | Enlarged area (Å <sup>2</sup> ) |
|-----------------------------|-----------|--------|-------------------------------------|-------------------------------------|---------------------------------|
| Gs                          | PE2R2     | 7CX3   | 19                                  |                                     | 7.46                            |
|                             | AA2AR     | 6GDG   | 19                                  |                                     | 48.59                           |
|                             | PE2R4     | 7D7M   | 21                                  |                                     | 29.46                           |
|                             | ADRB1     | 7JJO   | 22                                  |                                     | 168.51                          |
|                             | 5HT7R     | 7XTC   | 22                                  |                                     | 165.12                          |
|                             | GPR101    |        | 22                                  |                                     | 150.38                          |
|                             | MC4R      | 7F53   | 23                                  |                                     | 180.59                          |
|                             | 5HT6R     | 7XTB   | 23                                  |                                     | 108.44                          |
|                             | ADRB3     | 7DH5   | 24                                  |                                     | 151.39                          |
|                             | GPR6      |        | 24                                  |                                     | 306.59                          |
|                             | HRH2      |        | 25                                  |                                     | 243.00                          |
|                             | ADRB2     | 7DHI   | 25                                  |                                     | 222.38                          |
|                             | GPR3      |        | 25                                  |                                     | 311.54                          |
|                             | MSHR      | 7F4H   | 26                                  |                                     | 301.35                          |
|                             | GPBAR     | 7CFN   | 29                                  |                                     | 426.46                          |
|                             | GPR52     | 6LI3   | 29                                  |                                     | 433.47                          |
|                             | DRD1      | 7JV5   | 33                                  |                                     | 560.19                          |
| Gi/o                        | LPAR1     | 7TD0   |                                     | 21                                  | 63.50                           |
|                             | ACM2      | 6OIK   |                                     | 22                                  | 131.17                          |
|                             | CCR1      | 7VL9   |                                     | 22                                  | 84.65                           |
|                             | 5HT1E     | 7E33   |                                     | 22                                  | 120.93                          |
|                             | CCR3      | 7X9Y   |                                     | 22                                  | 147.37                          |
|                             | HCAR2     | 8J6P   |                                     | 22                                  | 87.91                           |
|                             | 5HT1F     | 7EXD   |                                     | 22                                  | 115.27                          |
|                             | S1PR1     | 7TD4   |                                     | 22                                  | 115.86                          |
|                             | DRD3      | 7CMV   |                                     | 22                                  | 163.38                          |
|                             | DRD2      | 7JVR   |                                     | 22                                  | 121.53                          |
|                             | CNR1      | 6N4B   |                                     | 22                                  | 82.16                           |
|                             | CNR2      | 6PT0   |                                     | 22                                  | 94.40                           |
|                             | CCR5      | 7F1S   |                                     | 23                                  | 91.91                           |
|                             | CCR2      | 7XA3   |                                     | 23                                  | 108.66                          |
|                             | S1PR5     | 7EW1   |                                     | 23                                  | 116.87                          |
|                             | ADA2B     | 6K41   |                                     | 23                                  | 106.97                          |
|                             | AA1R      | 7LD3   |                                     | 24                                  | 120.70                          |
|                             | NPY1R     | 7VGX   |                                     | 24                                  | 82.05                           |
|                             | SSR2      | 7T10   |                                     | 26                                  | 90.65                           |
|                             | S1PR3     | 7EW2   |                                     | 26                                  | 249.07                          |
|                             | OPRM      | 6DDE   |                                     | 27                                  | 131.96                          |
|                             | GALR1     | 7WQ3   |                                     | 27                                  | 293.18                          |
|                             | HRH3      |        |                                     | 29                                  | 311.53                          |
| 5HT1D                       | 7E32      |        | 31                                  | 219.26                              |                                 |
| 5HT1B                       | 6G79      |        | 31                                  | 174.84                              |                                 |
| 5HT1A                       | 7E2Y      |        | 35                                  | 192.90                              |                                 |



**Table S10.** Effects of truncation of histamine receptors at TM5/TM6

|                                              | <b>pEC50±SEM<sup>a,b</sup></b> | <b>E<sub>max</sub>±SEM<sup>a,b</sup></b> | <b>n</b> | <b>Expression<br/>(% WT)</b> |
|----------------------------------------------|--------------------------------|------------------------------------------|----------|------------------------------|
| H <sub>2</sub> R-WT                          | 8.38±0.10                      | 99±1                                     | 6        | 100                          |
| H <sub>2</sub> R-ΔI216 <sup>5,72</sup> -I219 | 7.80±0.12                      | 102.50±15.56                             | 4        | 56.27±10.72                  |
| H <sub>2</sub> R-ΔQ212 <sup>5,68</sup> -I219 | ND                             | ND                                       | 3        | 113.66±6.75                  |
|                                              | <b>pEC50±SEM<sup>a,b</sup></b> | <b>E<sub>max</sub>±SEM<sup>a,b</sup></b> | <b>n</b> | <b>Expression<br/>(% WT)</b> |
| H <sub>3</sub> R-WT                          | 9.05±0.03                      | -0.48±0.05                               | 3        | 100                          |
| H <sub>3</sub> R-ΔR274-S351 <sup>6,28</sup>  | 8.85±0.11                      | -0.49±0.05                               | 3        | 95.59±12.81                  |
| H <sub>3</sub> R-ΔR274-S352 <sup>6,29</sup>  | 9.13±0.08                      | -0.41±0.05                               | 3        | 84.39±12.84                  |

<sup>a</sup> Data shown are means ± SEM from at least three independent experiments performed in technical triplicate. \*P<0.01; \*\*P<0.001 and \*\*\*P<0.0001 by one-way ANOVA followed by Dunnett's multiple comparisons test, compared with the response of the WT.

<sup>b</sup> The E<sub>max</sub> is defined as the window between the maximal response and the vehicle. ND, not determinable, which refers to cannot be established over the tested concentration range, such that an E<sub>max</sub> was not reached and therefore span could not be calculated. NR refers to no response (or response < 10% WT) occurred as the concentration of ligand changes.

**Table S11.** Characteristics of activated class B1 GPCR structures from GPCRdb datasets

| <b>Receptor</b>                                        | <b>Uniprot</b> | <b>family</b> | <b>pdb_code</b> | <b>primary</b> | <b>TM5 length</b> | <b>TM5 tilt</b> | <b>TM6 length</b> | <b>TM6 outward movement</b> |
|--------------------------------------------------------|----------------|---------------|-----------------|----------------|-------------------|-----------------|-------------------|-----------------------------|
| CT receptor<br>calcitonin<br>receptor-like<br>receptor | CALCR          | B1            | 8F2B            | G <sub>s</sub> | 22                | 13.43           | 24                | 44.51                       |
| CRF1 receptor                                          | CRFR1          | B1            | 6PB0            | G <sub>s</sub> | 22                | 15.97           | 24                | 36.73                       |
| CRF2 receptor                                          | CRFR2          | B1            | 6PB1            | G <sub>s</sub> | 22                | 15.27           | 24                | 37.01                       |
| GHRH receptor                                          | GHRHR          | B1            | 7V9M            | G <sub>s</sub> | 18                | 14.26           | 20                | 38.57                       |
| GIP receptor                                           | GIPR           | B1            | 7FIN            | G <sub>s</sub> | 22                | 18.83           | 23                | 44.29                       |
| GLP-1 receptor                                         | GLP1R          | B1            | 7DUQ            | G <sub>s</sub> | 21                | 15.33           | 21                | 44.28                       |
| GLP-2 receptor<br>glucagon<br>receptor                 | GLP2R          | B1            | 7D68            | G <sub>s</sub> | 21                | 18.37           | 24                | 42.84                       |
|                                                        | GLR            | B1            | 8FU6            | G <sub>s</sub> | 20                | 15.1            | 20                | 41.93                       |
| PAC1 receptor                                          | PACR           | B1            | 8E3X            | G <sub>s</sub> | 20                | 12.07           | 21                | 44.74                       |
| PTH1 receptor                                          | PTH1R          | B1            | 6NBI            | G <sub>s</sub> | 24                | 20.87           | 23                | 36.22                       |
| PTH2 receptor<br>secretin<br>receptor                  | PTH2R          | B1            | 7F16            | G <sub>s</sub> | 21                | 15.63           | 24                | 37.2                        |
|                                                        | SCTR           | B1            | 6WZG            | G <sub>s</sub> | 20                | 12.83           | 24                | 41.22                       |
| VPAC1<br>receptor                                      | VIPR1          | B1            | 8E3Y            | G <sub>s</sub> | 20                | 13.92           | 20                | 39.85                       |
| VPAC2<br>receptor                                      | VIPR2          | B1            | 7WBJ            | G <sub>s</sub> | 20                | 15.69           | 19                | 40.45                       |
